# Supplementary material
Source: Research Square preprint supplement (doi:10.21203/rs.3.rs-9490663/v1)
Supplement: Supplementary file 1 [file 246adc523e7cde876cadcf1a.docx]

**(Supporting Information)**

**A Hierarchical Au@PDA-PdCu Nanozyme for Signal-Amplified Immunochromatographic Detection of Carbofuran in Leafy Vegetables**

Haofeng Lao†, a, Xuhui Yue†, a, Xiaoqing Weng†, a, Shaokang Zhanga, Jiachen Shi*, a ,Yuanfeng Wang*, a

a Development Center of Plant Germplasm Resources, College of Life Sciences, Shanghai Normal University, Shanghai 200234, China

† These authors contributed equally to this work.

* Corresponding author.


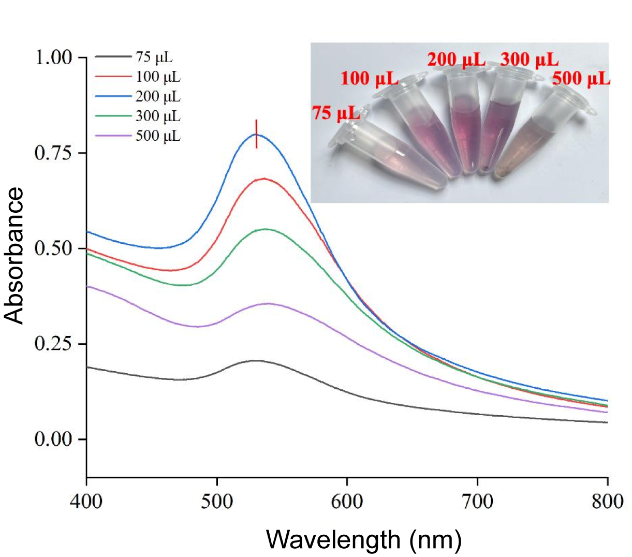


**Figure S1. Optimization of DA·HCl dosage for the synthesis of Au@PDA-PdCu nanozymes.**


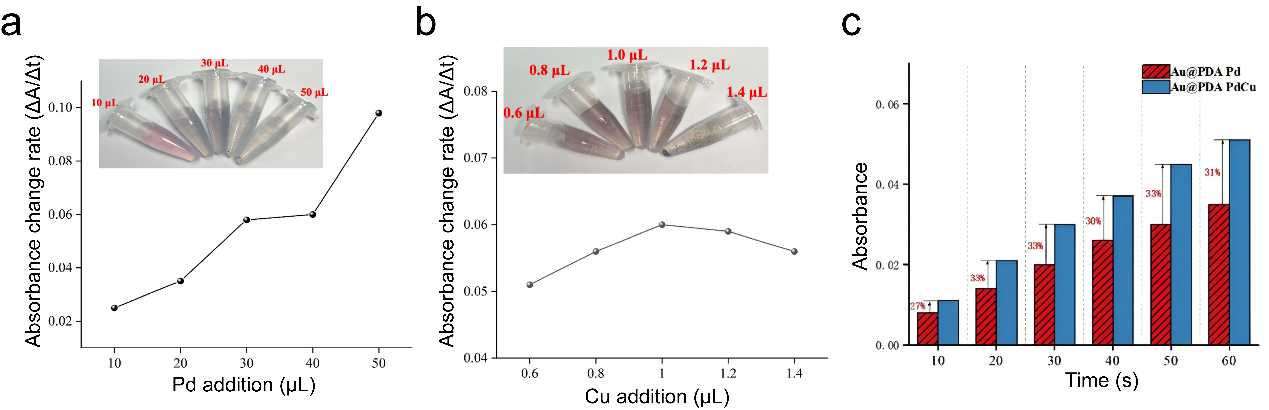


**Figure S2. Optimization of Pd and Cu feeding amounts: (a) optimization of Pd addition; (b) optimization of Cu addition; (c) comparison of absorbance change rates between Au@PDA-Pd and Au@PDA-PdCu nanozymes.**


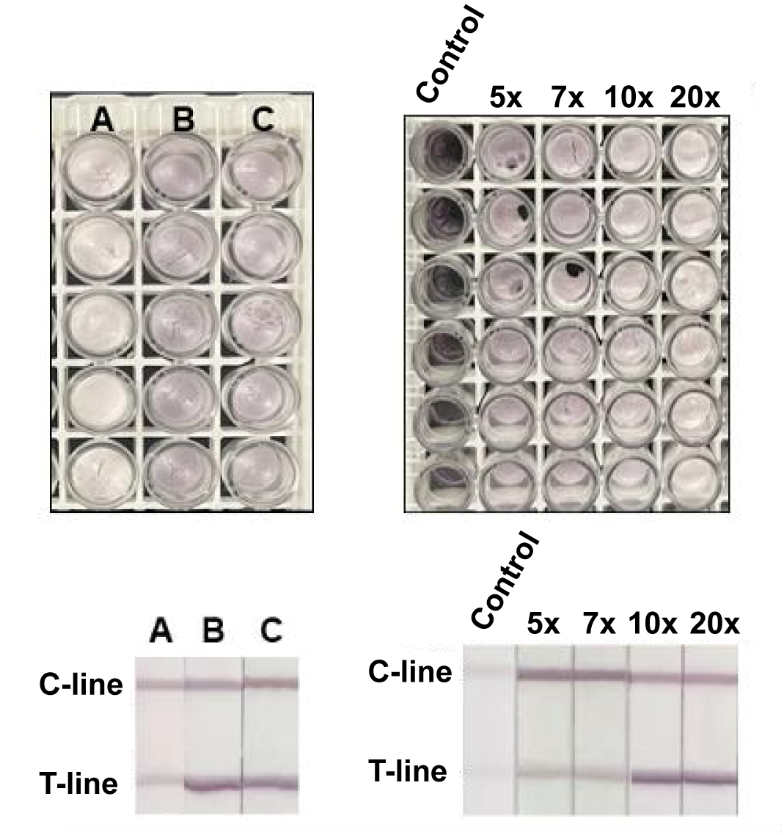


**Figure S3. Optimization of the solid content in lyophilized probe conjugates.**


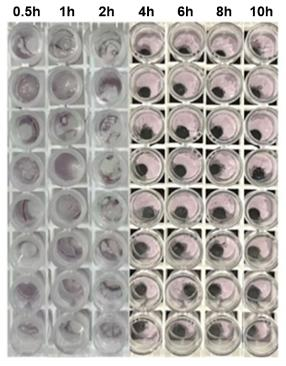


**Figure S4. Optimization of the lyophilization time for probe preparation.**


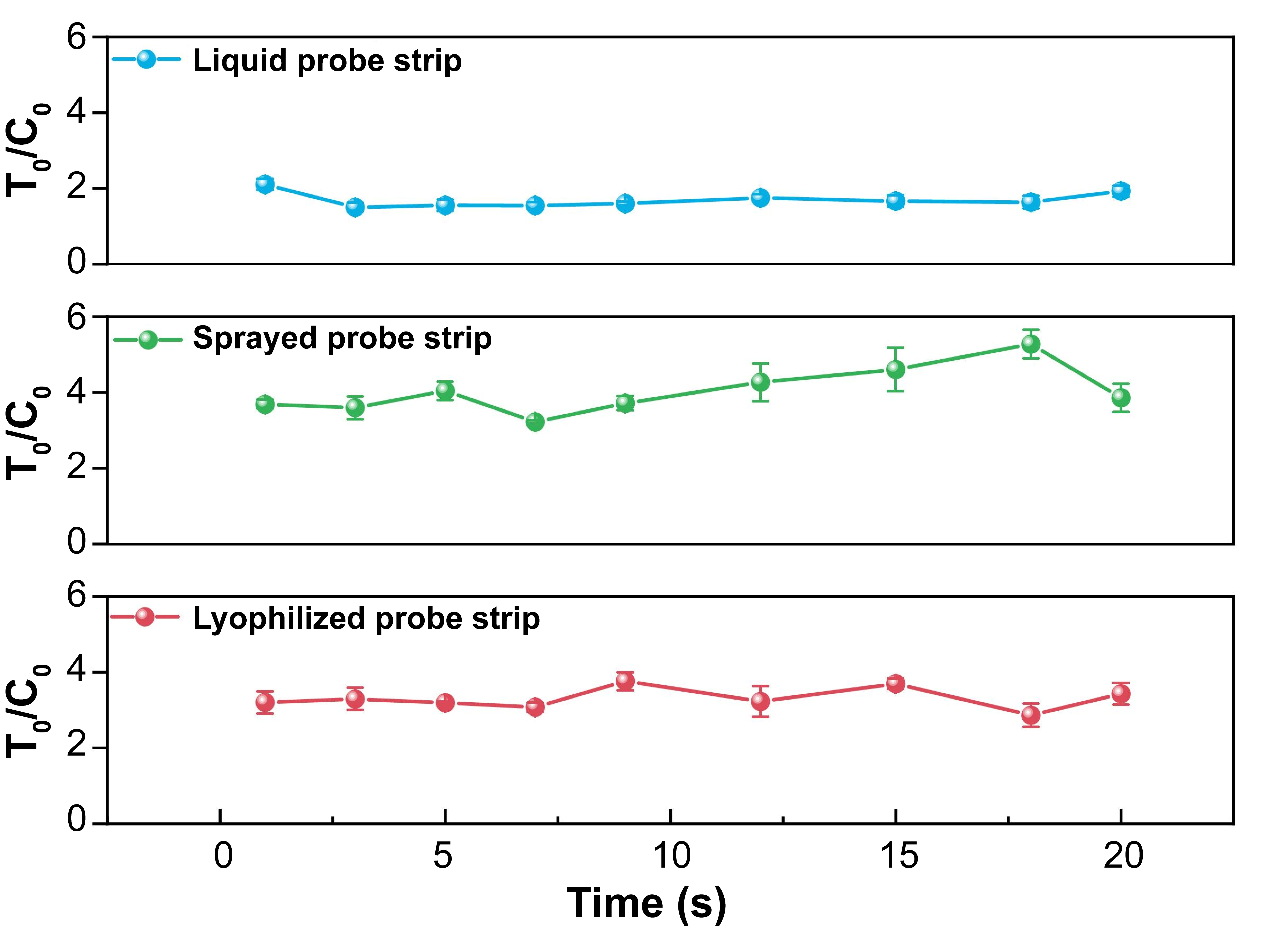


**Figure S5. Accelerated aging stability test of ICA strips prepared with liquid, sprayed, and lyophilized probes.**


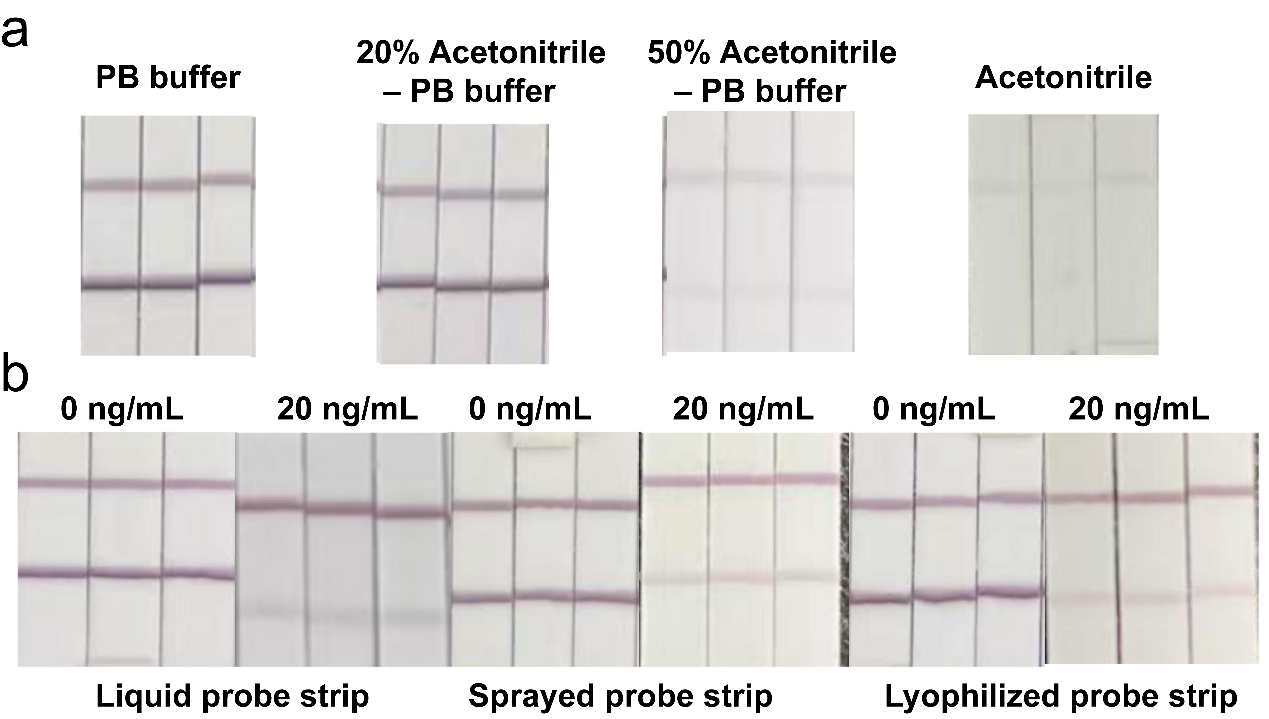


**Figure S6. Optimization of sample extraction reagents: (a) comparison of extraction solvent ratios; (b) colorimetric performance of extracts on ICA strips prepared with three probe types.**


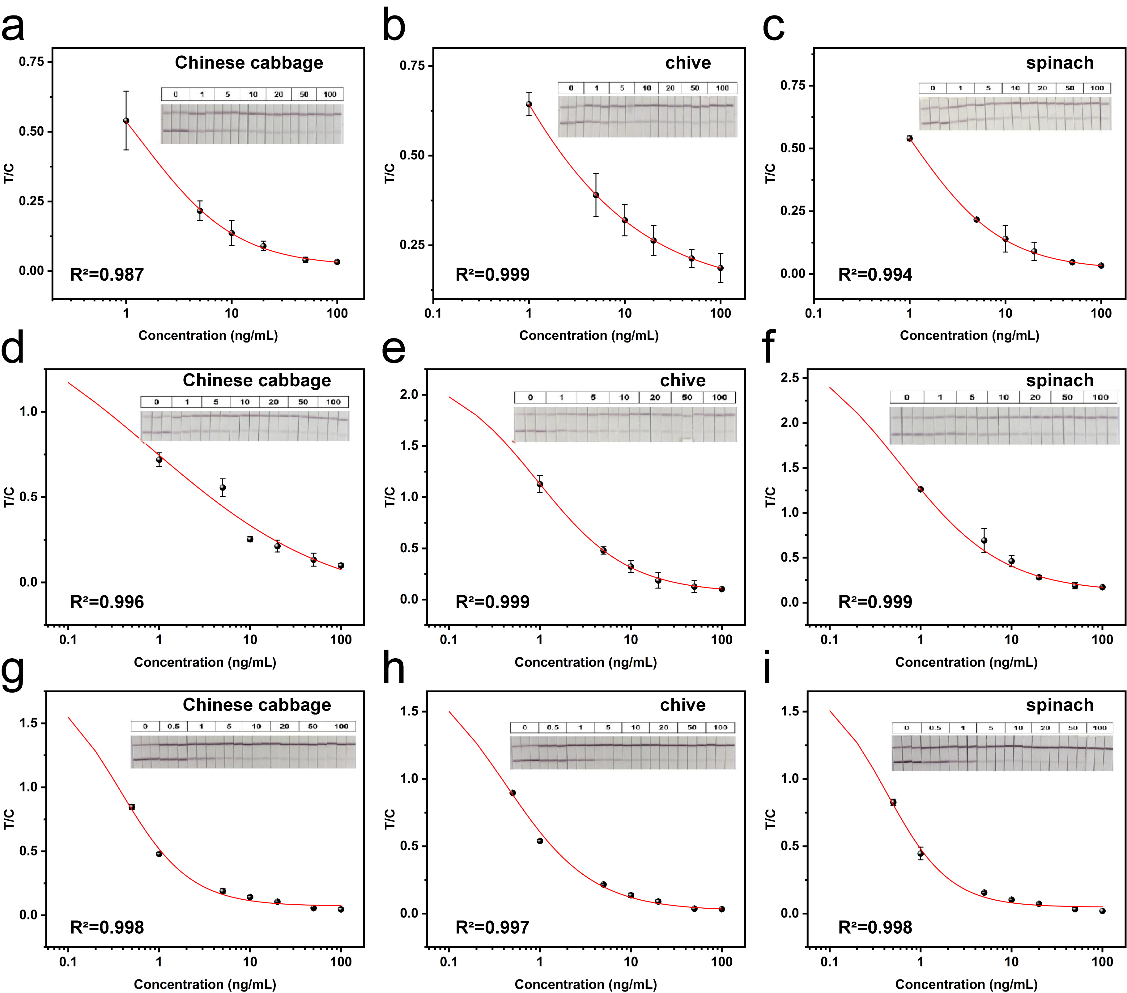


**Figure S7. Calibration curves of three types of carbofuran ICA strips—** **(a, b, c) liquid, (d, e, f) sprayed, and (g, h, i) lyophilized—tested with Chinese cabbage, chive, and spinach samples.**

**Table S1. Optimization results of liquid-type probe-based ICA parameters determined by the checkerboard titration method.**

| Probe quantity (μL) | Concentration (mg/mL) | T-line | T/C | inhibition ratio (%) |
| --- | --- | --- | --- | --- |
| 10 | 0.4 | 2125.9±319.8 | 0.54±0.04 | 44.3±14.5 |
| 20 | 3534.8±717.0 | 0.47±0.04 | 51.3±6.5 |
| 30 | 5555.3±376.2 | 0.76±0.01 | 27.4±3.0 |
| 10 | 0.5 | 1388.8±240.1 | 0.37±0.08 | 62.8±17.1 |
| 20 | 2666.2±267.5 | 0.46±0.08 | 55.8±5.7 |
| 30 | 3134.9±812.8 | 0.57±0.09 | 51.1±1.7 |
| 10 | 0.6 | 2271.5±113.9 | 1.04±0.02 | 41.7±1.2 |
| 20 | 4735.7±131.7 | 1.13±0.03 | 41.2±3.0 |
| 30 | 5130.4±239.3 | 1.25±0.20 | 32.0±7.5 |

**Table S2. Optimization results of sprayed-type probe-based ICA parameters determined by the checkerboard titration method.**

| **Probe quantity (μL/cm)** | **Concentration (mg/mL)** | **T-line** | **T/C** | **inhibition ratio (%)** |
| --- | --- | --- | --- | --- |
| 3 | 0.4 | 1138.8±57.8 | 0.28±0.07 | 86±3.8 |
| 3.5 | 2041.3±336.1 | 0.46±0.04 | 69.8±14 |
| 4 | 2922±1219.6 | 0.58±0.24 | 27.4±3.0 |
| 3 | 0.5 | 1639.4±454.1 | 0.28±0.06 | 81.1±5.7 |
| 3.5 | 3307.3±654.1 | 0.46±0.06 | 78.3±3.5 |
| 4 | 4097.4±401.8 | 0.49±0.03 | 75.2±1.6 |
| 3 | 0.6 | 1475.8±933.1 | 0.31±0.18 | 82.5±8.8 |
| 3.5 |  | 2436.6±1196.9 | 0.43±0.17 | 78.2±7.2 |
| 4 |  | 1804.4±307.4 | 0.35±0.03 | 77.8±5.1 |

**Table S3. Optimization results of lyophilized-type probe-based ICA parameters determined by the checkerboard titration method.**

| **Probe quantity (μL)** | **Concentration (mg/mL)** | **T-line** | **T/C** | **inhibition ratio (%)** |
| --- | --- | --- | --- | --- |
| 5 | 0.1 | 1166.9±212.3 | 0.22±0.03 | 94.4±0.5 |
| 10 | 1654.8±70.9 | 0.22±0.01 | 91.4±0.2 |
| 15 | 2308.7±190 | 0.25±0.02 | 90.0±0.9 |
| 5 | 0.2 | 1078.7±104.9 | 0.22±0.01 | 94.0±1.2 |
| 10 | 2130.5±211 | 0.33±0.05 | 91.2±0.8 |
| 15 | 2313.9±172.2 | 0.29±0.03 | 91.2±1.1 |
| 5 | 0.3 | 1159±87.5 | 0.26±0.03 | 95.8±1.1 |
| 10 | 1927.1±112.2 | 0.30±0.02 | 92.1±1.6 |
| 15 | 2438.7±466 | 0.39±0.08 | 88.1±1.2 |

**Table S4. Analytical performance of three carbofuran ICA strips for detection in three vegetable matrices.**

| **Test strip type** | **Vegetable species** | **Detection mode** | **IC50(ng/ml)** | **LOD(ng/ml)** |
| --- | --- | --- | --- | --- |
| Liquid probe strip | Chinese cabbage | Direct | 0.469 | 0.053 |
| DAB-enhanced | 1.061 | 0.107 |
| Chive | Direct | 0.119 | 0.008 |
| DAB-enhanced | 0.373 | 0.014 |
| Spinach | Direct | 0.368 | 0.081 |
| DAB-enhanced | 0.454 | 0.081 |
| Sprayed probe strip | Chinese cabbage | Direct | 0.117 | 0.002 |
| DAB-enhanced | 0.839 | 0.035 |
| Chive | Direct | 0.936 | 0.190 |
| DAB-enhanced | 0.560 | 0.069 |
| Spinach | Direct | 0.599 | 0.100 |
| DAB-enhanced | 2.608 | 0.240 |
| Lyophilized probe strip | Chinese cabbage | Direct | 0.371 | 0.067 |
| DAB-enhanced | 0.464 | 0.090 |
| Chive | Direct | 0.414 | 0.090 |
| DAB-enhanced | 0.371 | 0.067 |
| Spinach | Direct | 0.422 | 0.139 |
| DAB-enhanced | 0.856 | 0.153 |
